# Supplementary material
Source: HighWire-hosted journal article supplement (https://jnm.snmjournals.org/highwire/filestream/94445/field_highwire_adjunct_files/0/116343_Supplemental_Data.pdf)
Supplement: 116343_Supplemental_Data.pdf [file 116343_Supplemental_Data.pdf]

**Supplemental Table 1:  
Patient Characteristics and Results**

| Patient no. | Sex | Age (y) | Clinical indication for performing SPECT HR FP-CT/<br>final patient diagnosis                                                                                            | Diagnostic<br>confidence<br>SPECT/HR FP-CT:<br>reader 1/reader 2 | Diagnostic<br>confidence<br>SPECT/LR-CT:<br>reader 1/reader 2 | Agreement SPECT/HR<br>FP-CT with final patient<br>diagnosis:<br>reader 1/reader 2 | Agreement SPECT/LR-<br>CT with final patient<br>diagnosis:<br>reader 1/reader 2 |
|-------------|-----|---------|--------------------------------------------------------------------------------------------------------------------------------------------------------------------------|------------------------------------------------------------------|---------------------------------------------------------------|-----------------------------------------------------------------------------------|---------------------------------------------------------------------------------|
| 1           | F   | 57      | Suspected osteomyelitis/<br>transient osteoporosis of lower leg/foot associated with lymphedema                                                                          | 2/2                                                              | 3/2                                                           | No/No                                                                             | No/No                                                                           |
| 2           | F   | 55      | Suspected osteomyelitis/<br>complex regional pain syndrome associated with lymphedema                                                                                    | 2/2                                                              | 3/2                                                           | No/No                                                                             | No/No                                                                           |
| 3           | M   | 28      | Suspected osteomyelitis/<br>chronic osteomyelitis of calcaneus                                                                                                           | 1/1                                                              | 1/1                                                           | Yes/Yes                                                                           | Yes/Yes                                                                         |
| 4           | M   | 56      | Suspected osteomyelitis/<br>chronic osteomyelitis of distal femur                                                                                                        | 1/1                                                              | 1/2                                                           | Yes/Yes                                                                           | Yes/Yes                                                                         |
| 5           | F   | 45      | Suspected osteomyelitis/<br>chronic osteomyelitis of calcaneus with adjacent active soft-tissue<br>calcifications                                                        | 1/1                                                              | 1/2                                                           | Yes/Yes                                                                           | Yes/No                                                                          |
| 6           | M   | 73      | Suspected osteomyelitis/<br>Charcot foot with chronic osteomyelitis of talus                                                                                             | 1/1                                                              | 2/2                                                           | Yes/Yes                                                                           | Yes/Yes                                                                         |
| 7           | M   | 41      | Suspected osteomyelitis/<br>Brodie abscess of distal femur                                                                                                               | 1/2                                                              | 2/2                                                           | Yes/Yes                                                                           | Yes/Yes                                                                         |
| 8           | W   | 73      | Suspected osteomyelitis/<br>wound infection after osteosynthetic reconstruction of a tibial fracture with<br>no signs of osteomyelitis                                   | 1/1                                                              | 2/2                                                           | Yes/Yes                                                                           | No/Yes                                                                          |
| 9           | F   | 47      | Suspected osteomyelitis/<br>nonfusion of calcaneal fracture after osteosynthetic treatment with no<br>signs of osteomyelitis and degenerative disease of adjacent joints | 1/1                                                              | 2/2                                                           | Yes/Yes                                                                           | No/No                                                                           |
| 10          | M   | 59      | Suspected osteomyelitis/<br>Charcot foot with chronic osteomyelitis of osseous fragments of<br>the hindfoot                                                              | 1/2                                                              | 2/2                                                           | Yes/Yes                                                                           | Yes/Yes                                                                         |
| 11          | M   | 45      | Suspected osteomyelitis/<br>infarct of calcaneus with no signs of osteomyelitis                                                                                          | 1/1                                                              | 2/2                                                           | Yes/No                                                                            | No/No                                                                           |

|    |   |    |                                                                                                                                                  |     |     |         |         |
|----|---|----|--------------------------------------------------------------------------------------------------------------------------------------------------|-----|-----|---------|---------|
| 12 | F | 71 | Suspected osteomyelitis/<br>stress fracture of second metatarsal bone                                                                            | 1/1 | 2/2 | Yes/Yes | No/Yes  |
| 13 | M | 61 | Suspected osteomyelitis/<br>Charcot foot with degenerative changes and no signs of osteomyelitis                                                 | 1/1 | 3/2 | Yes/Yes | No/Yes  |
| 14 | F | 40 | Suspected degenerative joint disease/<br>status post displacement of the tibial tuberositas with degenerative<br>disease of femoropatellar joint | 1/1 | 2/2 | Yes/Yes | Yes/Yes |
| 15 | F | 40 | Suspected degenerative joint disease/<br>status post displacement of the tibial tuberositas with degenerative<br>disease of femoropatellar joint | 1/1 | 2/2 | Yes/Yes | Yes/Yes |
| 16 | F | 57 | Suspected degenerative joint disease/<br>history of rheumatoid arthritis and postarthritic degenerative disease of<br>STT joint                  | 1/1 | 2/2 | Yes/Yes | No/No   |
| 17 | F | 62 | Suspected degenerative joint disease/<br>history of rheumatoid arthritis and postarthritic degenerative disease of<br>upper ankle joint          | 1/1 | 2/2 | Yes/Yes | No/No   |
| 18 | M | 62 | Suspected degenerative joint disease/<br>posttraumatic degenerative disease of upper ankle joint and<br>tarsometatarsal joints                   | 1/1 | 2/2 | Yes/Yes | Yes/Yes |
| 19 | M | 69 | Suspected degenerative joint disease/<br>severe arthritic changes in a clubfoot with no signs of osteomyelitis                                   | 1/1 | 2/2 | Yes/Yes | Yes/Yes |
| 20 | M | 33 | Suspected degenerative joint disease/<br>arthrosis of the upper ankle joint with ventral impingement                                             | 1/1 | 2/2 | Yes/Yes | No/No   |
| 21 | M | 32 | Suspected degenerative joint disease/<br>arthrosis of the upper ankle joint with dorsal impingement                                              | 1/1 | 2/2 | Yes/Yes | No/No   |
| 22 | F | 73 | Suspected degenerative joint disease/<br>arthrosis of the knee with no signs of synovitis or osteomyelitis                                       | 1/1 | 2/2 | Yes/Yes | Yes/Yes |
| 23 | M | 30 | Suspected degenerative joint disease/<br>osteochondrosis dissecans with secondary degenerative disease of upper<br>ankle joint                   | 1/1 | 3/2 | Yes/Yes | No/No   |
| 24 | M | 23 | Suspected degenerative joint disease/<br>osteochondrosis dissecans with secondary degenerative disease of upper<br>ankle joint                   | 1/1 | 2/2 | Yes/Yes | Yes/Yes |
| 25 | M | 22 | Suspected degenerative joint disease/<br>osteochondrosis dissecans                                                                               | 1/2 | 2/2 | Yes/Yes | Yes/Yes |

|    |   |    |                                                                                                                                                       |     |     |          |          |
|----|---|----|-------------------------------------------------------------------------------------------------------------------------------------------------------|-----|-----|----------|----------|
| 26 | F | 50 | Suspected degenerative joint disease/<br>osteochondrosis dissecans and fusion of calcaneocuboidal joint<br>arthrodesis                                | 1/1 | 2/2 | Yes/Yes  | No/Yes   |
| 27 | F | 16 | Suspected degenerative joint disease/<br>osteochondrosis dissecans                                                                                    | 1/1 | 1/3 | Yes/Yes  | Yes/No   |
| 28 | F | 65 | Evaluation of arthroplasty and arthrodesis/<br>loosening of knee prosthesis                                                                           | 1/1 | 2/2 | Yes/Yes  | Yes/Yes  |
| 29 | M | 58 | Evaluation of arthroplasty and arthrodesis/<br>loosening of knee prosthesis                                                                           | 1/2 | 1/1 | Yes/ Yes | Yes/Yes  |
| 30 | F | 70 | Evaluation of arthroplasty and arthrodesis/<br>arthrosis of the femoropatellar joint with no sign of knee prosthesis<br>loosening                     | 1/1 | 2/2 | Yes/Yes  | Yes/ Yes |
| 31 | M | 37 | Evaluation of arthroplasty and arthrodesis/<br>arthrosis of the tibiotalar and tibiofibular joint with no sign of upper ankle<br>prosthesis loosening | 2/2 | 2/2 | Yes/Yes  | Yes/Yes  |
| 32 | F | 47 | Evaluation of arthroplasty and arthrodesis/<br>arthrosis of the tibiotalar and fibulotalar joint with no sign of upper ankle<br>prosthesis loosening  | 1/1 | 2/2 | Yes/No   | Yes/No   |
| 33 | F | 55 | Evaluation of arthroplasty and arthrodesis/<br>no signs of loosening of knee sled-prosthesis                                                          | 1/2 | 2/2 | Yes/ Yes | Yes/Yes  |
| 34 | M | 52 | Evaluation of arthroplasty and arthrodesis/<br>arthrosis of the femoropatellar joint with no sign of knee prosthesis<br>loosening                     | 1/1 | 2/2 | Yes/Yes  | Yes/Yes  |
| 35 | M | 53 | Evaluation of arthroplasty and arthrodesis/<br>arthrosis of the fibulotalar joint with no sign of upper ankle prosthesis<br>loosening                 | 1/2 | 2/2 | Yes/ Yes | Yes/Yes  |
| 36 | F | 50 | Evaluation of arthroplasty and arthrodesis/<br>No loosening of knee sled prosthesis with stress-induced changes of the<br>medial tibial plateau       | 1/1 | 2/2 | Yes/Yes  | Yes/No   |
| 37 | F | 67 | Evaluation of arthroplasty and arthrodesis/<br>nonfusion of talonavicular joint arthrodesis                                                           | 1/1 | 1/2 | Yes/Yes  | No/No    |
| 38 | F | 52 | Evaluation of arthroplasty and arthrodesis/<br>fusion of talonavicular joint arthrodesis with degenerative disease of<br>adjacent joints              | 1/2 | 2/2 | Yes/ Yes | Yes/Yes  |
| 39 | F | 63 | Evaluation of arthroplasty and arthrodesis/<br>nonfusion of calcaneocuboidal joint arthrodesis                                                        | 2/2 | 2/2 | Yes/Yes  | No/No    |

|    |   |    |                                                                                                                                                     |     |     |         |        |
|----|---|----|-----------------------------------------------------------------------------------------------------------------------------------------------------|-----|-----|---------|--------|
| 40 | F | 51 | Evaluation of arthroplasty and arthrodesis/<br>nonfusion of upper ankle joint arthrodesis with osteomyelitis of the talus                           | 1/1 | 3/2 | Yes/Yes | No/No  |
| 41 | F | 53 | Evaluation of arthroplasty and arthrodesis/<br>nonfusion of upper and lower ankle joint arthrodesis with degenerative<br>disease of adjacent joints | 1/1 | 2/2 | Yes/Yes | No/Yes |

**3-point diagnostic confidence scale for image interpretation: Score 1, SPECT/CT allows a definitive diagnosis that answers the clinical question. Score 2, there is an abnormality on the SPECT/CT study probably explaining patient's symptoms, but it is not possible to make a definitive diagnosis. Follow-up or additional examinations are recommended for further evaluation. Score 3, no relevant abnormality explaining patient's symptoms can be detected on the SPECT/CT images.**

**SPECT/HR FP-CT images = SPECT/high-resolution flat-panel CT images; SPECT/LR-CT images = SPECT/low-resolution CT images.**

**Supplemental Table 2  
Added Value of High-Resolution Flat-Panel and Low-Resolution CT Images  
in the Interpretation of SPECT/CT**

| Areas of examination                                                      | High-resolution flat-panel CT images                                                                                                                                                                                                                                                                    | Low-resolution CT images                           |
|---------------------------------------------------------------------------|---------------------------------------------------------------------------------------------------------------------------------------------------------------------------------------------------------------------------------------------------------------------------------------------------------|----------------------------------------------------|
| Degenerative joint disease/<br>Osteochondritis dissecans<br>(14 patients) | - Improved localization of regions of increased tracer uptake<br>- Detailed morphologic information regarding the degree of osteophytes, subchondral sclerosis, superimposed arthritic bony erosions, separation of the osteochondral fragment, and extent of involvement of the subchondral bone plate | Localization of regions of increased tracer uptake |
| Osteomyelitis<br>(13 patients)                                            | - Improved localization of regions of increased tracer uptake<br>- Detailed morphologic information in areas of complex anatomy regarding alterations such as osteolysis, sclerosis, sequestra and intraosseous fistulas                                                                                | Localization of regions of increased tracer uptake |
| Arthroplasty/arthrodesis<br>(14 patients)                                 | - Improved localization of regions of increased tracer uptake<br>- Reduced metallic and beam-hardening artifacts, making it feasible to localize linear lucent areas adjacent to arthroplasties indicating loosening and to image minute bridging trabeculation across the area of arthrodesis          | Localization of regions of increased tracer uptake |
